# Supplementary material
Source: ML conference proceedings conference paper supplement (https://www.ecva.net/papers/eccv_2022/papers_ECCV/html/136890089_ECCV_2022_paper.php)
Supplement: Supplementary file 1 [file 136890089-supp.zip]

# AdaAfford: Learning to Adapt Manipulation Affordance for 3D Articulated Objects via Few-shot Interactions

Yian Wang<sup>1,2\*</sup>, Ruihai Wu<sup>1,2\*</sup>, Kaichun Mo<sup>3\*</sup>, Jiaqi Ke<sup>1,2</sup>,  
Qingnan Fan<sup>4</sup>, Leonidas Guibas<sup>3</sup>, and Hao Dong<sup>1,2,5†</sup>

<sup>1</sup> CFCS, CS Dept., PKU

<sup>2</sup> AIT, PKU

{yianwang, wuruihai, kjq001220, hao.dong}@pku.edu.cn

<sup>3</sup> Stanford University

{kaichun, guibas}@cs.stanford.edu

<sup>4</sup> Tencent AI Lab

fqnchina@gmail.com

<sup>5</sup> Peng Cheng Lab

<https://hyperplane-lab.github.io/AdaAfford>

## 1 More Detailed Data Statistics

Table 1 summarizes the data statistics and splits. Figure 1 visualizes some example shapes from our dataset.

## 2 More Details about Method

In our setting, the subsequent interactions always continue from the previous interactions. But it actually doesn’t matter for our method, we can take any distribution of test-time interactions in the training process and it won’t violate our design.

The input point cloud  $O$  is the current observation and might be changed if an interaction successfully moves the object.

## 3 More Experiment Settings

*Details of Baselines* For **Ours-fps**, **Where2Act-interaction** and **Where2Act-adaptation** baselines, we augment the FPS method with an actionability score. In detail, we only select the points with higher actionability scores than a preset threshold (*e.g.*, 0.5). If there are not enough such points, the threshold will be set lower until there exist at least 50 points whose actionability scores are higher than the threshold. For **Where2Act-adaptation** baseline, we first train a network to give the similarities between points. For point  $p_1$  and point  $p_2$ , given their point features extracted by PointNet++ and the distance between them, the network outputs a similarity score  $sim_{p_1p_2}$ . Then, an interaction  $I = (O, p, R, m)$  acting on  $p$  with action score  $s_u$  will influence point  $q$  by:

$$(r - s_u) * sim_{pq} \quad (1)$$

\* Equal contribution

† Corresponding author.

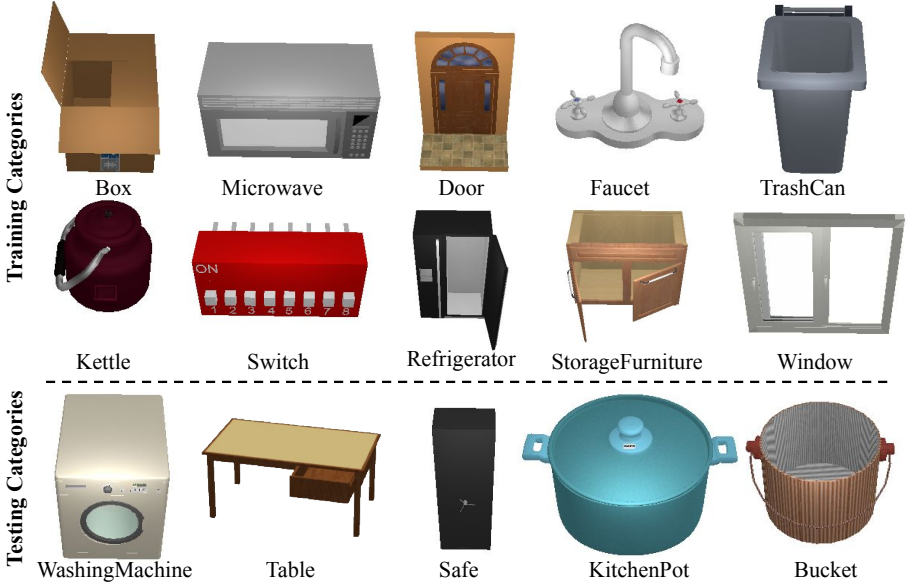

**Fig. 1. Data Visualization.** We show example shapes of object categories in our paper.

where  $r = 1$  if  $m > \tau$  (e.g.,  $\tau = 0.01$ ) or  $r = 0$ ,  $u = (p, R)$ . Specifically, if the original actionability score of point  $q$  is  $a_q$  and the original action score of an arbitrary action  $u_* = (q, R_*)$  on point  $q$  is  $s_{u_*}$ , the new action score  $s_{u_*}^{new}$  and actionability score  $a_q^{new}$  would be:

$$s_{u_*}^{new} = s_{u_*} + (r - s_{u_*}) * sim_{pq} \quad (2)$$

$$a_q^{new} = a_q + (r - s_{u_*}) * sim_{pq} \quad (3)$$

To train the network to give similarity between points, similar to our method, we use the ground truth result of the action  $u_*$  as the regression target of  $s_{u_*}^{new}$ .

*More baselines* We employ several baselines using FPS method to sample interaction points, and the results show the usefulness of the proposed AIP module of our framework.

- **Ours-purefps:** that directly uses FPS method to sample interaction points without using actionability scores.
- **Ours-argfps:** that uses FPS augmented with actionability scores to select interaction points. When sampling a new point, we combine its distance to the sampled point set with its actionability score while doing FPS, as the weighted distance.
- **Where2Act-interaction:** the Where2Act method augmented with four additional interaction observations as inputs where the interaction positions are

**Table 1.** We first summarize the shape counts in our dataset for pushing and pulling shapes over all categories, in which there are three data splits: training data from the training categories, test data from the training categories, and data from the test categories. We use the first split to train and use the rest two for evaluation. We further show the shape counts in our two additional tasks: pulling closed door and pushing faucet (denoted as Closed Door and Faucet for brevity).

| Train-Cats         | Box        | Microwave    | Door      | Faucet   | TrashCan |
|--------------------|------------|--------------|-----------|----------|----------|
| Train / Test       | 20 / 8     | 9 / 3        | 23 / 12   | 65 / 19  | 52 / 17  |
|                    | Kettle     | Refrigerator | Switch    | Cabinet  | Window   |
|                    | 22 / 7     | 32 / 11      | 53 / 17   | 270 / 75 | 40 / 18  |
| Total              | 586 / 187  |              |           |          |          |
| Test-Cats          | Table      | Washer       | Bucket    | Pot      | Safe     |
|                    | 95         | 16           | 36        | 23       | 29       |
| Total              | 199        |              |           |          |          |
| ADDL Exp. Category | Train data |              | Test data |          |          |
| Closed door        | Cabinet    | 74           | 11        |          |          |
| Faucet             | Faucet     | 15           | 4         |          |          |

uniformly sampled over the predicted affordance heatmap using Furthest Point Sampling (FPS) and we train an additional encoding branch similar to the *Adaptive Information Encoder* to extract the additional input feature; As the Where2Act baseline only takes visual information, in this baseline, we train an end-to-end network takes not only the visual input but also 4 interactions generated by farthest-point-sample.

- **Ours-random:** a variant of our proposed method that we use randomly sampled interaction trials over the geometry instead of the AIP proposals;

## 4 More Results and Analysis

In Figure 2 and 3, we show more qualitative results. See the captions of these two figures for more details.

Table 2 shows the comparisons between different methods using FPS. In most cases, both **Ours-argfps** and **Ours-fps** achieve better results than **Ours-purefps**. Because in **Ours-purefps** baseline, FPS only cares about the 3D position of points discarding the point features. While **Ours-argfps** and **Ours-fps** utilize the action scores which are generated by point features and thus achieve better results. Results show that our framework gets better performance in most cases compared with those baselines, which further shows the effectiveness of our AIP module.

Compared to the **Where2Act-interaction** baseline that is fed with four interactions in one shot, our whole framework works better because our recur-

rent structure strategically and successively selects the most effective interaction trials.

Several aspects cause lower sample-success rate but don't hurt the contribution: a) There exist extreme cases in which no action will succeed (*e.g.*, door too heavy, window too slippery). b) Actions should be precise enough to complete given tasks. Minor changes in gripper poses may cause failures as the success criteria is set tightly, even when we have already selected the correct manipulation point.

Some objects in test-cat (*e.g.*, bucket) are easier to manipulate than those in the train-cat (*e.g.*, fridge), explaining that sometimes the test-cat numbers are higher than the train-cat ones.

**Table 2. Quantitative Evaluations.** Comparison with more baselines. Results show that our framework achieves the best performance in most cases.

|                          |                       | F-score (%)              | Sample-Succ (%)          |
|--------------------------|-----------------------|--------------------------|--------------------------|
| pushing all (train cat.) | Where2Act-interaction | 72.13                    | 31.53                    |
|                          | Ours-random           | 70.24/70.58/70.85        | 29.59/31.35/32.57        |
|                          | Ours-purefps          | 66.78/69.43/70.65        | 28.23/31.50/29.51        |
|                          | Ours-argfps           | 66.78/69.43/70.65        | 28.23/31.50/29.51        |
|                          | Ours-fps              | 64.32/69.58/70.99        | 26.22/27.30/30.65        |
|                          | Ours-final            | <b>72.78/73.12/75.18</b> | <b>33.82/33.23/35.23</b> |
| pushing all (test cat.)  | Where2Act-interaction | 76.12                    | 37.10                    |
|                          | Ours-random           | 75.12/76.92/76.98        | 30.78/30.78/29.48        |
|                          | Ours-purefps          | 66.35/66.55/67.19        | 34.15/32.60/35.06        |
|                          | Ours-argfps           | 74.04/75.03/76.63        | 33.11/34.54/36.49        |
|                          | Ours-fps              | 66.17/67.27/69.08        | 33.64/35.19/37.79        |
|                          | Ours-final            | <b>77.58/77.63/78.42</b> | <b>34.97/36.75/37.40</b> |
| pulling all (train cat.) | Where2Act-interaction | 38.28                    | 3.89                     |
|                          | Ours-random           | 35.03/34.48/36.84        | 4.44/2.78/6.11           |
|                          | Ours-purefps          | 35.46/37.54/37.35        | 2.78/5.56/2.78           |
|                          | Ours-argfps           | 35.46/37.54/37.35        | 3.89/4.44/6.11           |
|                          | Ours-fps              | 39.88/42.74/43.55        | 2.78/5.56/4.44           |
|                          | Ours-final            | <b>42.62/43.87/44.08</b> | <b>7.78/9.44/10.55</b>   |
| pulling all (test cat.)  | Where2Act-interaction | 45.80                    | 9.73                     |
|                          | Ours-random           | 41.97/44.88/46.11        | 6.13/4.78/8.26           |
|                          | Ours-purefps          | 43.60/48.91/47.36        | 6.96/5.22/3.91           |
|                          | Ours-argfps           | 45.17/47.39/50.60        | <b>8.69/7.22/10.00</b>   |
|                          | Ours-fps              | 43.67/42.77/48.33        | 4.35/3.91/4.78           |
|                          | Ours-final            | <b>49.51/50.00/51.33</b> | <b>5.21/7.39/10.45</b>   |
| pulling closed door      | Where2Act-interaction | 66.79                    | 9.09                     |
|                          | Ours-random           | 52.41/54.25/53.37        | 7.14/6.84/6.53           |
|                          | Ours-purefps          | 53.53/59.81/67.20        | 6.67/7.64/10.71          |
|                          | Ours-argfps           | 58.42/62.31/68.72        | 8.94/11.25/13.75         |
|                          | Ours-fps              | <b>59.79/63.43/69.13</b> | 8.88/11.33/12.10         |
|                          | Ours-final            | <b>57.83/65.60/79.65</b> | <b>10.86/11.57/22.14</b> |
| pushing faucet           | Where2Act-interaction | 79.85                    | 80.97                    |
|                          | Ours-random           | 72.61/76.29/79.16        | 61.81/79.01/80.82        |
|                          | Ours-purefps          | 73.39/79.13/79.85        | 61.88/76.59/72.50        |
|                          | Ours-argfps           | 74.66/78.30/79.61        | 61.42/66.65/74.75        |
|                          | Ours-fps              | 74.19/79.36/77.95        | 60.44/70.12/77.41        |
|                          | Ours-final            | <b>77.42/83.06/83.83</b> | <b>65.90/81.66/82.14</b> |

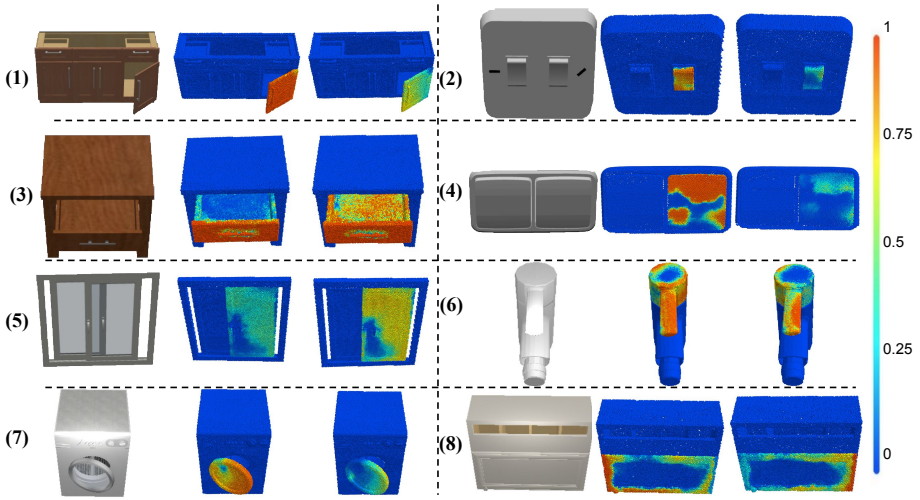

**Fig. 2.** We visualize more results for the adapted affordance predictions given by the AAP module conditioned on different hidden kinematic and dynamic information. From the first to the last block, we respectively change the 1) mass of target part 2) joint friction 3) friction coefficient on the target part’s surface 4) joint friction 5) friction coefficient on the target part’s surface 6) rotating direction of the faucet 7) mass of target part 8) axis location of the door, and clearly see reasonable adaptations in affordance predictions.

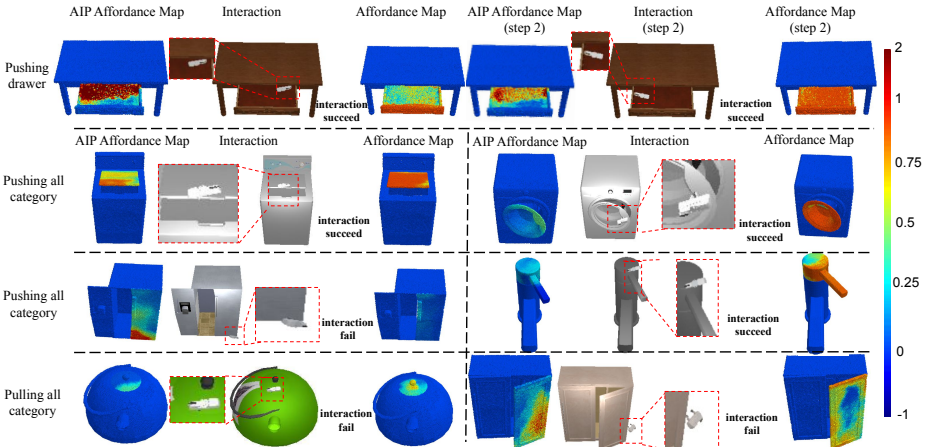

**Fig. 3.** We visualize more results for the interactions proposed by the AIP module and the corresponding AIP affordance map predictions. In the first row, we show the initial and the second AIP affordance maps, the corresponding proposed interactions, and the posterior affordance map predictions. In the last three rows, we present six more examples that only one interaction is needed.
